# Supplementary material for: Synthesis of high aspect ratio CuO submicron rods through oriented attachment and their application in lithium-ion batteries
Source: Royal Society of Chemistry journal article supplement (doi:10.1039/c5ra07592k), 2015-01-01
Supplement: c5ra07592k1.pdf [file c5ra07592k1.pdf]

Supplementary Material (ESI) for RSC Advances

This journal is © The Royal Society of Chemistry 2015

Electronic Supporting Information

## **Synthesis of high aspect ratio CuO submicron rods through oriented attachment and their application in lithium-ion batteries**

Hequan Wang,<sup>a</sup> Yunpeng Zong,<sup>ac</sup> Wenxia Zhao,<sup>b</sup> Li Sun,<sup>ac</sup> Ling Xin<sup>ac</sup> and Yong Liu<sup>\*c</sup>

<sup>a</sup> *School of Mechatronics Engineering, Shenyang Aerospace University, Shenyang 110136, China*

<sup>b</sup> *Instrumental Analysis & Research Center, Sun Yat-sen University, Guangzhou 510275, China*

<sup>c</sup> *State Key Laboratory of Optoelectronic Materials and Technologies, Sun Yat-sen University, Guangzhou 510275, China. Email: liuyong7@mail.sysu.edu.cn.*

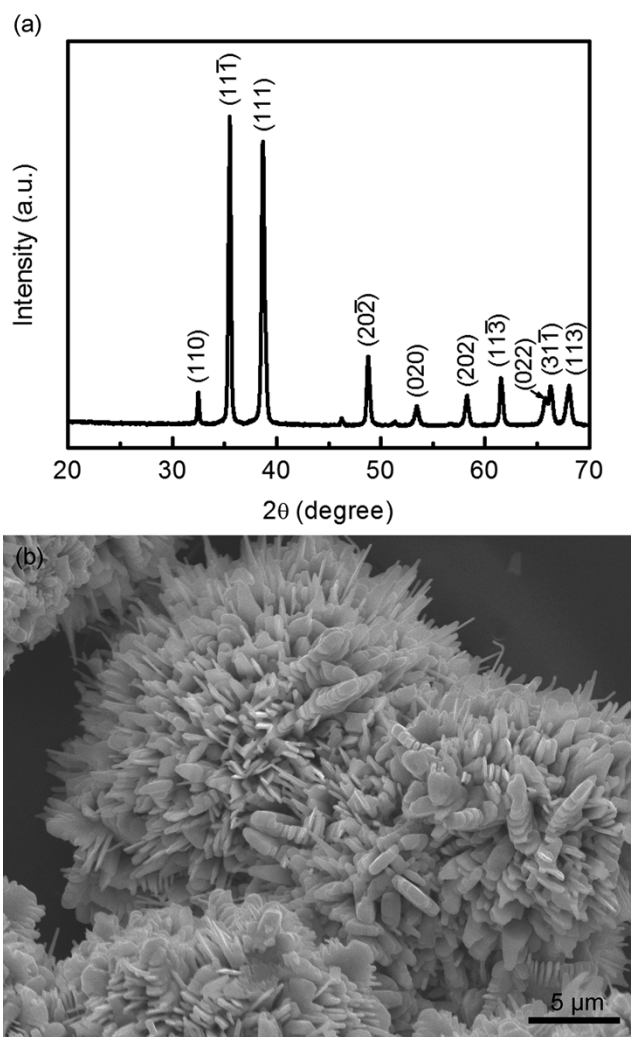

**Fig. S1** XRD pattern and SEM image of CuO nanoplatelets.
